# Supplementary material for: Derived myeloid lineage induced pluripotent stem as a platform to study human C-C chemokine receptor type 5Δ32 homozygotes
Source: PubMed Central journal article supplement — iScience. 2023 Oct 28;26(11):108331. doi: 10.1016/j.isci.2023.108331 (PMC10663745; doi:10.1016/j.isci.2023.108331), 2023-10-28
Supplement: mmc1.pdf [file mmc1.pdf]

**Supplemental information**

**Derived myeloid lineage induced pluripotent  
stem as a platform to study human C-C  
chemokine receptor type 5 $\Delta$ 32 homozygotes**

**Guibin Chen, Francesca Calcaterra, Yuchi Ma, Xianfeng Ping, Elena Pontarini, Dan Yang, Ferdinando Oriolo, Zhen Yu, Assunta Cancellara, Joanna Mikulak, Yuting Huang, Silvia Della Bella, Yangtengyu Liu, Leslie G. Biesecker, Rebecca L. Harper, Clifton L. Dalgard, Manfred Boehm, and Domenico Mavilio**

# Figure S1

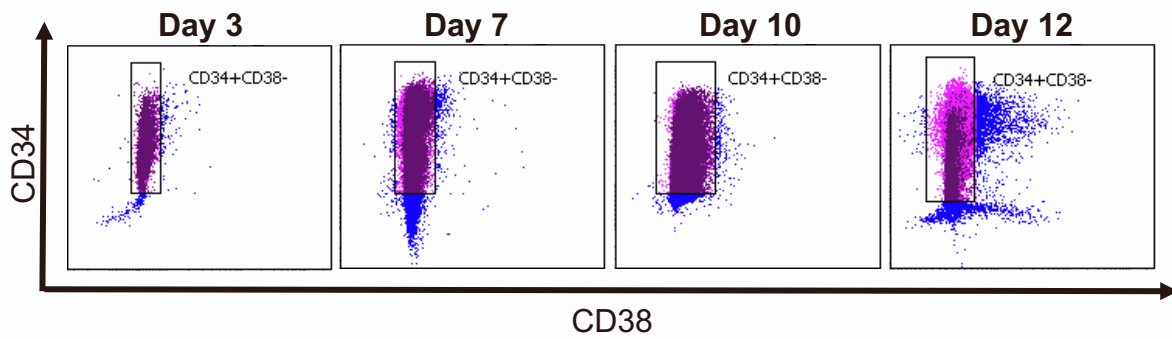

**Figure S1. Assessment of CD38 and CD34 expression during iPSCs towards iHSPCs differentiation, related to Figure 2.** Representative graphs showing that the majority of CD34<sup>+</sup> cells hold a CD38<sup>-</sup> phenotype at different time points during the iPSC differentiation process towards iHSPCs.

# Figure S2

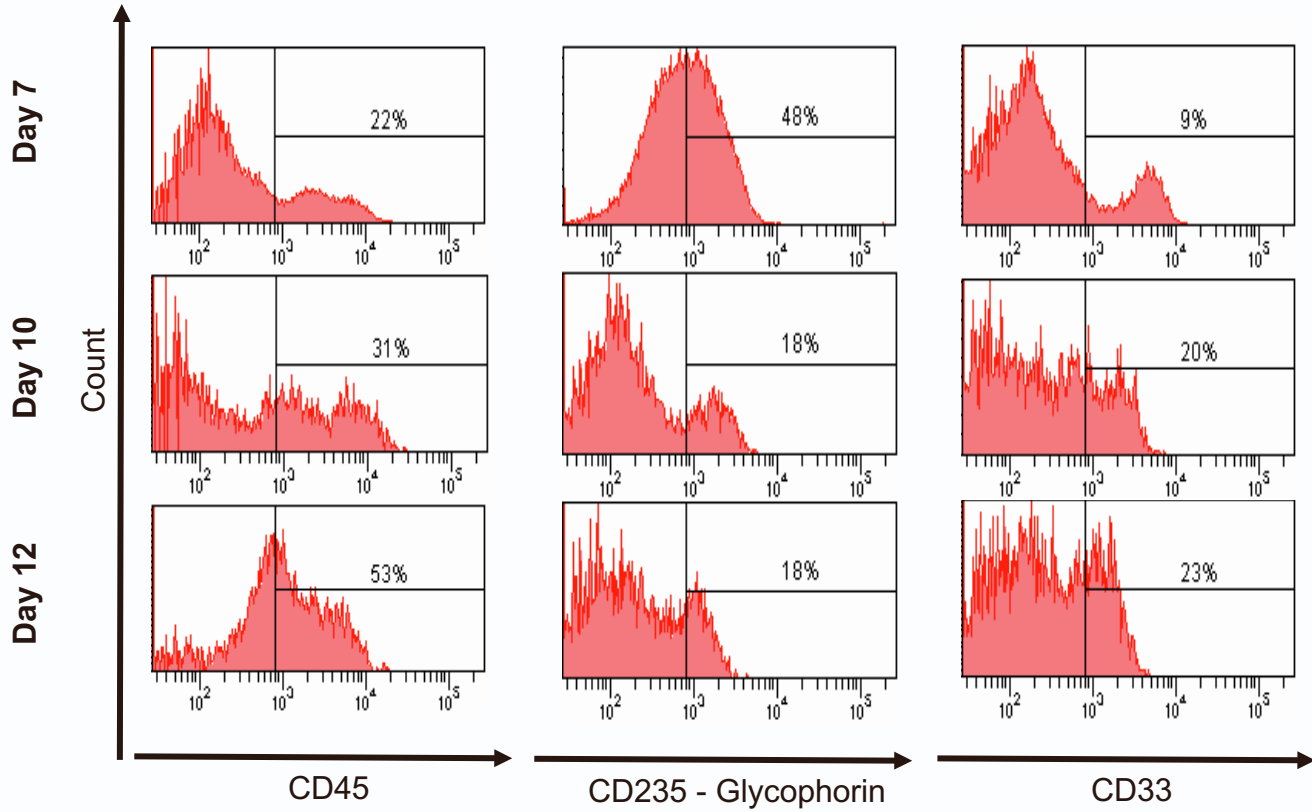

**Figure S2. Phenotype analysis of cells during Colony-Forming Unit (CFU) assay, related to Figure 2.** Representative graphs showing the expression levels of the pan-hematopoietic marker CD45 (left column), the erythroid marker glycophorin (CD235, middle column), and the myeloid marker CD33 (right column) on cells analyzed at different time points during CFU assay.

# Figure S3

**A**

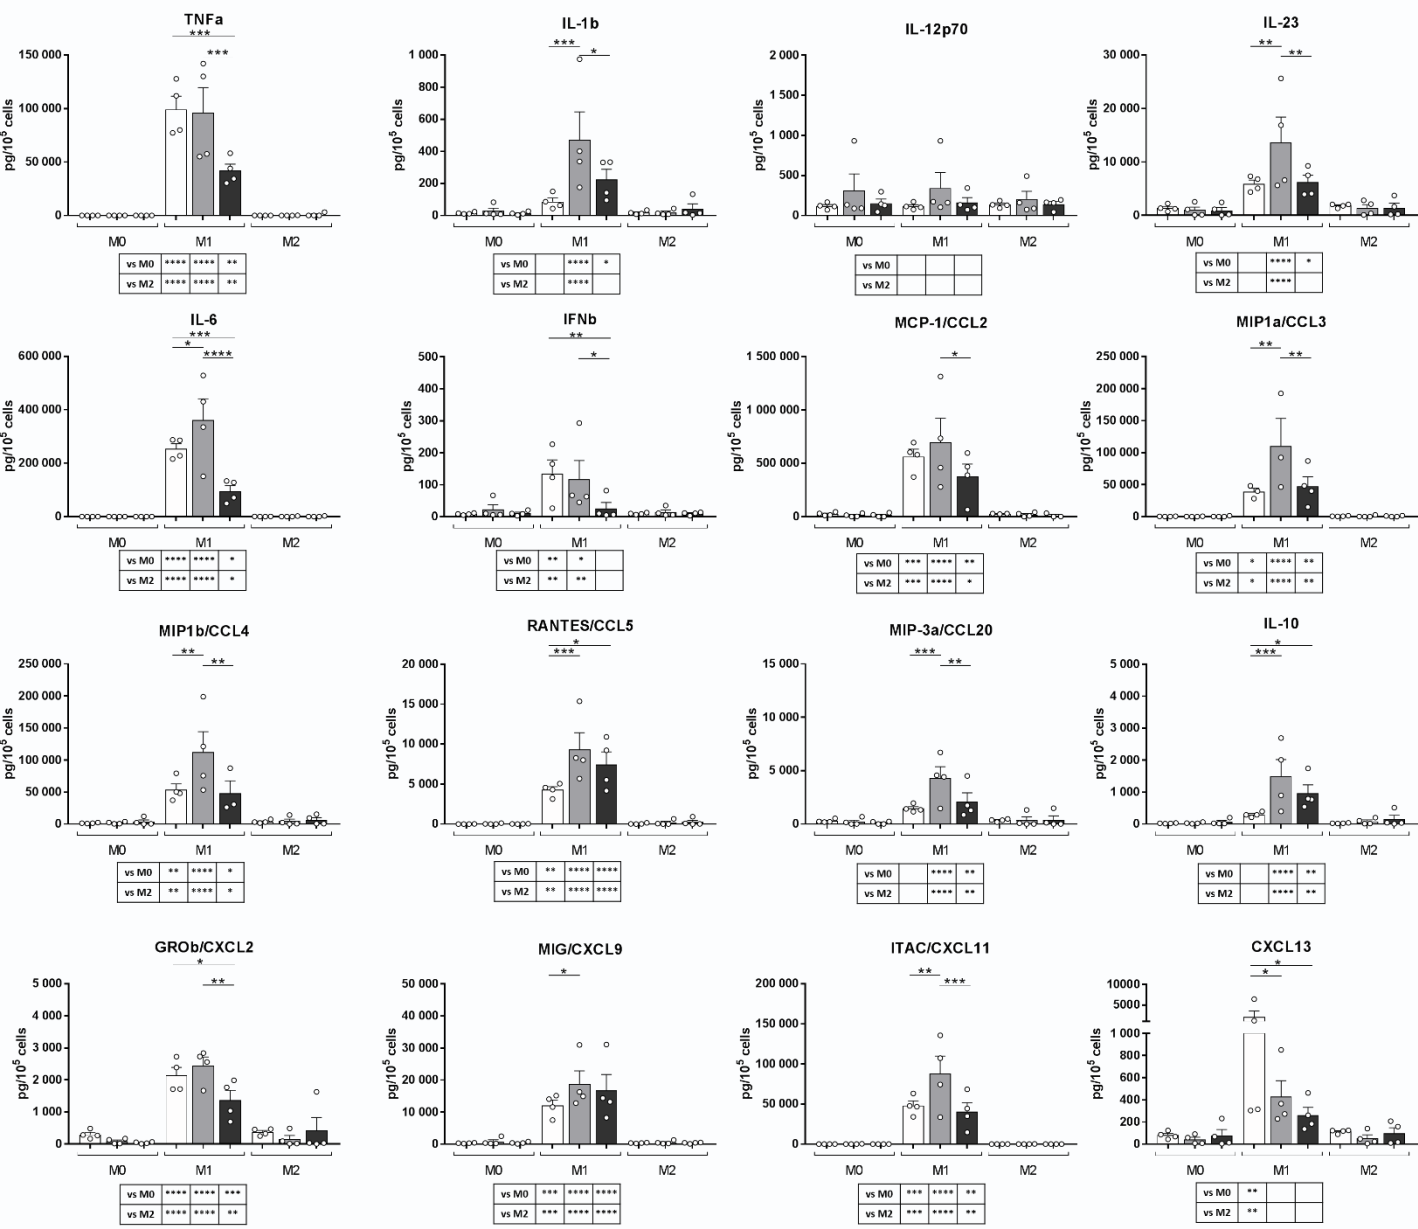

**B**

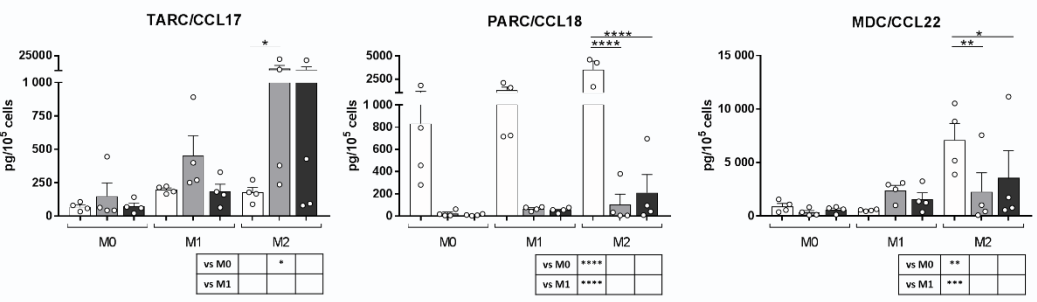

**Figure S3. Primary and iPSC-derived macrophage secretome profile, related to Figure 6.** Expression levels of M1 polarization markers (A) and M2 polarization markers (B) were analyzed in primary (white bar) and iPSC-derived M0, M1, and M2 macrophages obtained from both controls (light gray bar) and CCR5Δ32 variant (dark gray bar). Data are expressed as pg/10<sup>5</sup> cells and are presented as mean ± SEM. Statistical significance was calculated using ANOVA. \*p < 0.05; \*\*p < 0.01; \*\*\* p < 0.001; \*\*\*\* p < 0.0001.

# Table S1

| Primary |              | iPS-derived |              |             |            |
|---------|--------------|-------------|--------------|-------------|------------|
| Normal  |              | Normal      |              | CCR5D32     |            |
|         |              | iPS         | iPS_ctrl_3   |             |            |
|         |              |             | iPS_ctrl_4   |             |            |
|         |              |             | iPS_ctrl_6   |             |            |
| pmono   | pmono_ctrl_1 | imono       | imono_ctrl_1 |             |            |
|         | pmono_ctrl_2 |             | imono_ctrl_2 |             |            |
|         | pmono_ctrl_7 |             | imono_ctrl_5 |             |            |
| pM0     | pM0_ctrl_1   | iM0         | iM0_ctrl_1   | iM0_CCR5D32 | iM0_CCR5_1 |
|         | pM0_ctrl_7   |             | iM0_ctrl_2   |             | iM0_CCR5_2 |
|         | pM0_ctrl_8   |             | iM0_ctrl_3   |             | iM0_CCR5_3 |
|         |              |             | iM0_ctrl_4   |             |            |
|         | iM0_ctrl_5   |             |              |             |            |
| pM1     | pM1_ctrl_1   | iM1         | iM1_ctrl_1   | iM1_CCR5D32 | iM1_CCR5_1 |
|         | pM1_ctrl_2   |             | iM1_ctrl_2   |             | iM1_CCR5_2 |
|         | pM1_ctrl_7   |             | iM1_ctrl_3   |             | iM1_CCR5_3 |
|         | pM1_ctrl_8   |             | iM1_ctrl_4   |             |            |
|         |              |             | iM1_ctrl_5   |             |            |
| pM2     | pM2_ctrl_1   | iM2         | iM2_ctrl_1   | iM2_CCR5D32 | iM2_CCR5_1 |
|         | pM2_ctrl_7   |             | iM2_ctrl_2   |             | iM2_CCR5_2 |
|         | pM2_ctrl_8   |             | iM2_ctrl_3   |             | iM2_CCR5_3 |
|         |              |             | iM2_ctrl_4   |             |            |
|         |              |             | iM2_ctrl_5   |             |            |

**Table S1. List of samples used in RNA-seq analyses, related to Figure 4 and 5.**

# Table S2

| Panel                   | Staining | Target       | Fluorochrome | FACS Filters | Clone     | Company   | Catalog N° | Batch    |
|-------------------------|----------|--------------|--------------|--------------|-----------|-----------|------------|----------|
| iHSCs                   | Surface  | CD34         | PE           | YG582/15     | 561       | Biolegend | 343606     | B204487  |
|                         | Surface  | CD34         | BV510        | V510/20      | 581       | Biolegend | 343528     | B311638  |
|                         | Surface  | CD45         | APC          | R670/14      | H130      | Biolegend | 304012     | B190802  |
|                         | Surface  | CD33         | FITC         | B530-30      | HIM3-4    | Biolegend | 303304     | B284834  |
|                         | Surface  | CD38         | AF700        | R730/45      | HB-7      | Biolegend | 303516     | B303849  |
|                         | Surface  | CD235        | PE           | YG582/15     | HIR2      | Biolegend | 306604     | B203766  |
| Monocytes               | Surface  | CD14         | FITC         | B530/30      | GCD14     | Biolegend | 325604     | B211977  |
|                         | Surface  | CD16         | APC          | R670/14      | 3G8       | Biolegend | 302012     | B212891  |
|                         | Surface  | CD11b        | PE Cy5       | B655-730     | ICRF44    | Biolegend | 301308     | B191268  |
| Macrophage polarization | Surface  | CD115        | BV421        | V450/50      | 9-4D2-1E4 | BD        | 565347     | 5082979  |
|                         | Surface  | CD14         | BV570        | V575/26      | M5E2      | Biolegend | 301831     | B172009  |
|                         | Surface  | CD16         | AF700        | R730/45      | 3G8       | Biolegend | 302026     | B181825  |
|                         | Surface  | CD209        | PE           | YG582/15     | DCN46     | BD        | 551265     | 2097966  |
|                         | Surface  | CD80         | FITC         | B530/30      | L307-4    | BD        | 557226     | 96060    |
| M1 Macrophage phenotype | Surface  | CD86         | FITC         | B530/30      | 2331      | BD        | 555657     | 5606     |
|                         | Surface  | CD215        | APC          | R670/14      | JM7A4     | Biolegend | 330209     | 163590   |
|                         | Surface  | HLA-DR       | APC Cy7      | R780/60      | L243      | BD        | 335831     | 4226954  |
|                         | Surface  | CD195 (CCR5) | PE           | YG582/15     | 2D7/ CCR5 | BD        | 555993     | 93581    |
|                         | Surface  | CCR7         | PE CF594     | YG610/20     | 150503    | BD        | 562381     | 4085878  |
| M2 macrophage phenotype | Surface  | CD206        | FITC         | B530/30      | 19.2      | BD        | 551135     | 87315    |
|                         | Surface  | CD163        | PE           | YG582/15     | GHI/61    | BD        | 556018     | 8289     |
|                         | Surface  | CD200R       | APC          | R670/14      | OX-108    | Biolegend | 329307     | B196410  |
|                         | Surface  | CD204        | AF700        | R730/45      | 351615    | R&D       | FAB2708N   | F0114031 |

**Table S2. FACS Antibody Information, related to Figures 2-3, and 6 and to Supplementary Figures S1 and S2.**
